# Supplementary material
Source: Springer Nature journal article supplement (https://www.springermedizin.de/resource/supplementary/12885_2006_459_MOESM2_ESM.pdf/9469496)

15  $\mu\text{mol/L}$  Genistein  $\xrightarrow{24 \text{ hr}}$  3 Gy Radiation

**A**

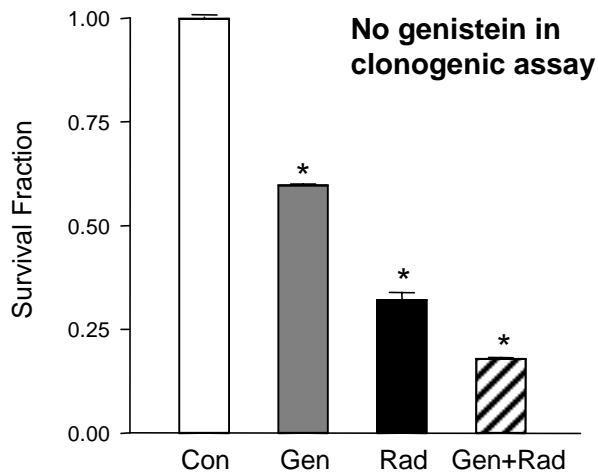

**B**

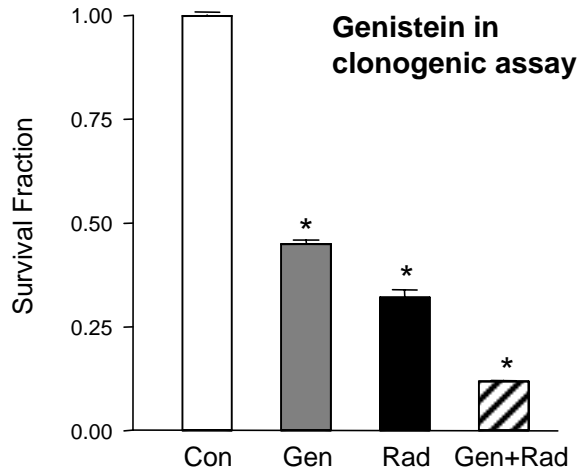

3 Gy Radiation  $\xrightarrow{24 \text{ hr}}$  15  $\mu\text{mol/L}$  Genistein

**C**

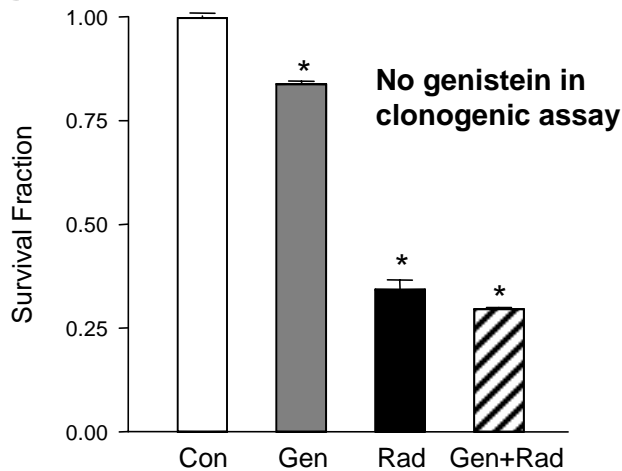

**D**

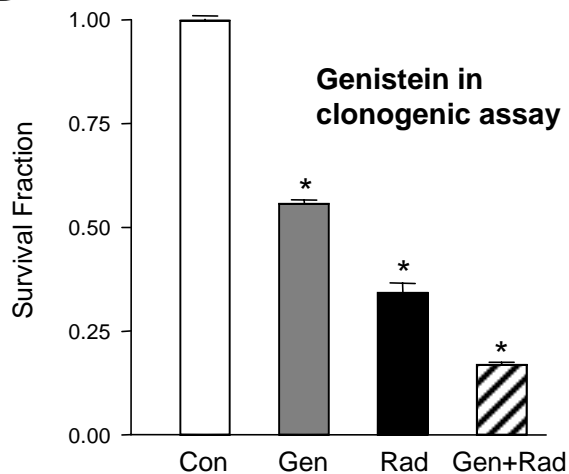

Supplement: MOESM2 [file 9469496]
